# Supplementary material for: The lectin-like oxidized LDL receptor-1: a new potential molecular target in colorectal cancer
Source: PubMed Central journal article supplement (PMC4924750; doi:10.18632/oncotarget.7430), 2016-02-17
Supplement: oncotarget-07-14765-s001.pdf [file oncotarget-07-14765-s001.pdf]

## SUPPLEMENTARY FIGURE

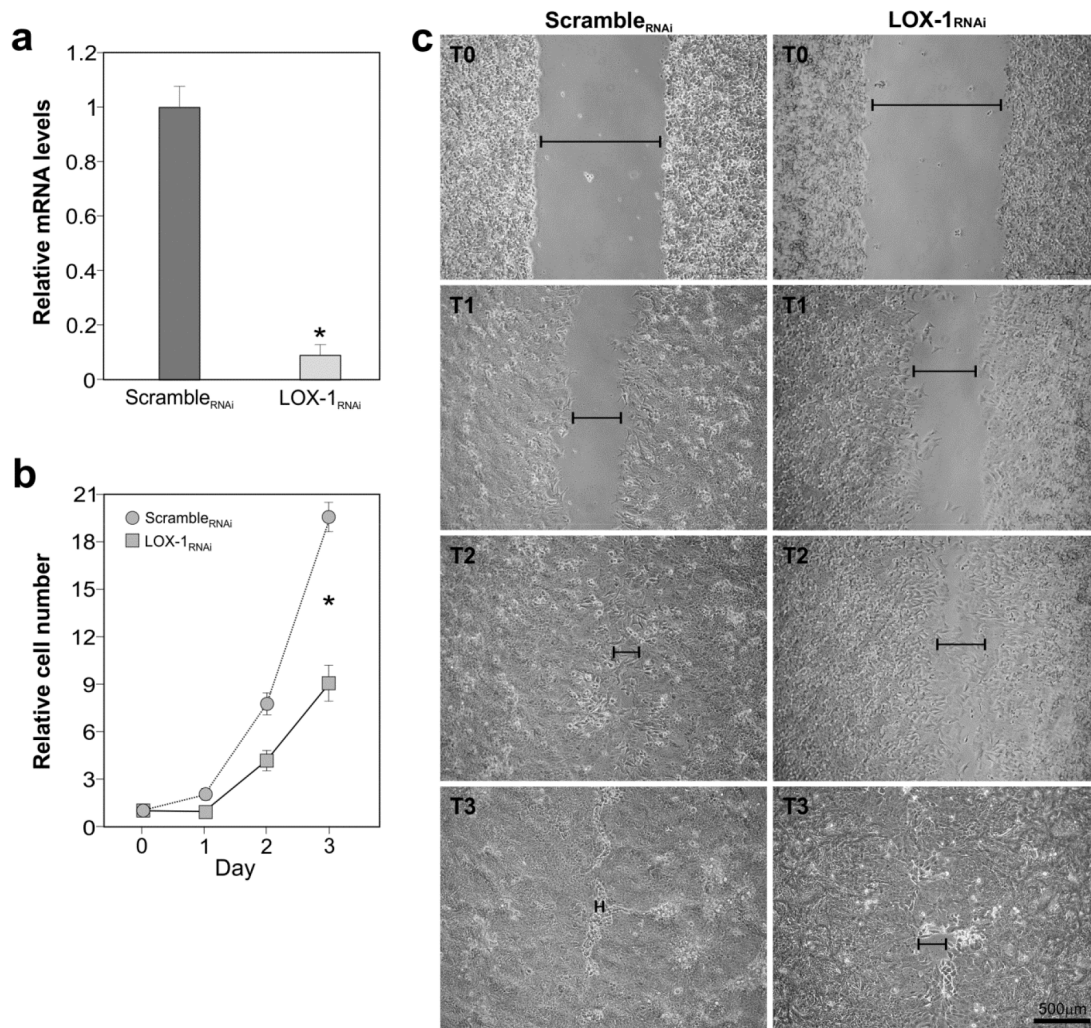

**Supplementary Figure S1: Effects of LOX-1 downregulation in HCT-8 cells.** **a.** RT-qPCR analyses of LOX-1 mRNA levels in LOX-1<sub>RNAi</sub> and Scramble<sub>RNAi</sub> HCT-8 cells, 6 days post virus administration. Data are representative of three independent experiments and reported as mean  $\pm$  SEM (\* $P$ <0,05). **b.** Growth curve of LOX-1<sub>RNAi</sub> and Scramble<sub>RNAi</sub> HCT-8 cells; (\* $P$ <0,05). **c.** Wound healing/invasion assay performed on LOX-1<sub>RNAi</sub> and Scramble<sub>RNAi</sub> HCT-8 cells. Images were captured at 0 hour (T0), and 24 hours (T1), 48 hours (T2) and 72 hours (T3) post wounding.
